# Supplementary material for: Tuning the electronic properties of WS2/Sc2C heterostructures via surface functionalization: a first-principles study
Source: Royal Society of Chemistry journal article supplement (doi:10.1039/d5cp01402f), 2025-01-01
Supplement: d5cp01402f1.pdf [file d5cp01402f1.pdf]

Supporting information

**Tuning the Electronic Properties of WS<sub>2</sub>/Sc<sub>2</sub>C Heterostructures  
via Surface Functionalization: A First-Principles Study**

Yulin Bu, Mengtao Sun \*

School of Mathematics and Physics, University of Science and Technology Beijing, Beijing  
100083, China

\* Corresponding Author. Email: mengtaosun@ustb.edu.cn (M. Sun).

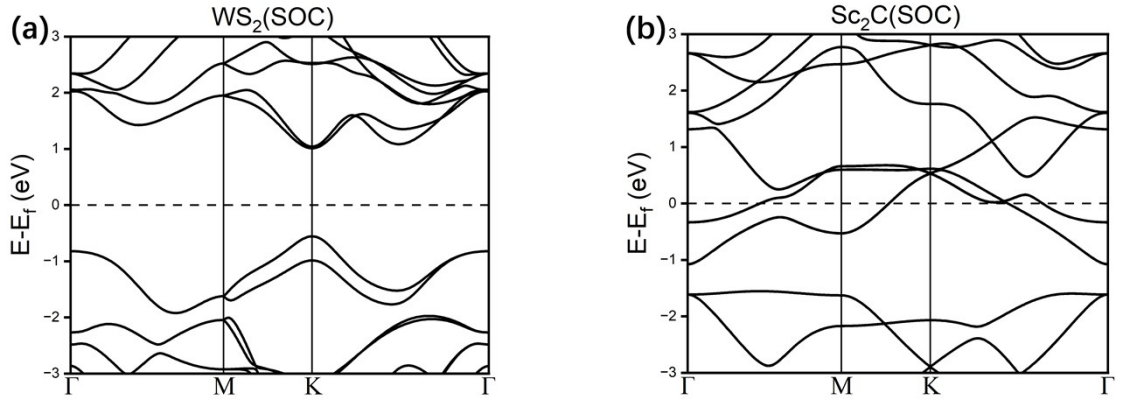

**Fig. S1.** Band structures of monolayer  $\text{WS}_2$  and monolayer  $\text{Sc}_2\text{C}$  with spin-orbit coupling (SOC) considered.

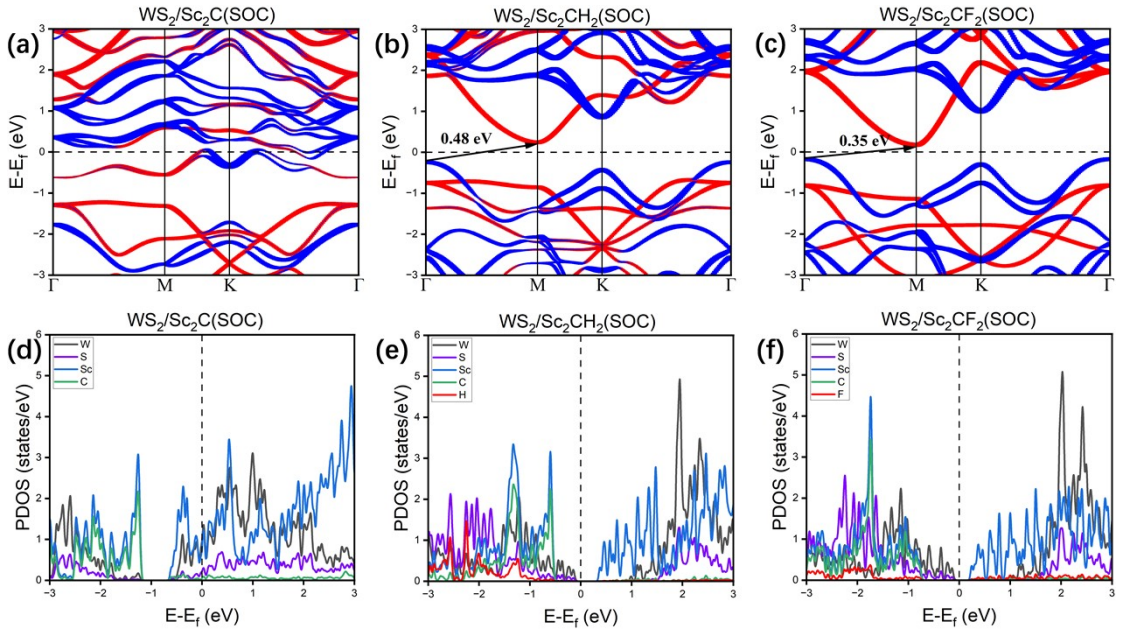

**Fig. S2.** Projected band structures of (a)  $\text{WS}_2/\text{Sc}_2\text{C}$ , (b)  $\text{WS}_2/\text{Sc}_2\text{CH}_2$ , and (c)  $\text{WS}_2/\text{Sc}_2\text{CF}_2$  heterostructures with spin-orbit coupling (SOC) considered. The contributions from  $\text{WS}_2$  and MXene are represented by the blue and red shading, respectively. The line width corresponds to the weight of the bands. Projected density of states (PDOS) of (d)  $\text{WS}_2/\text{Sc}_2\text{C}$ , (e)  $\text{WS}_2/\text{Sc}_2\text{CH}_2$ , and (f)  $\text{WS}_2/\text{Sc}_2\text{CF}_2$  heterostructures with spin-orbit coupling (SOC) considered.

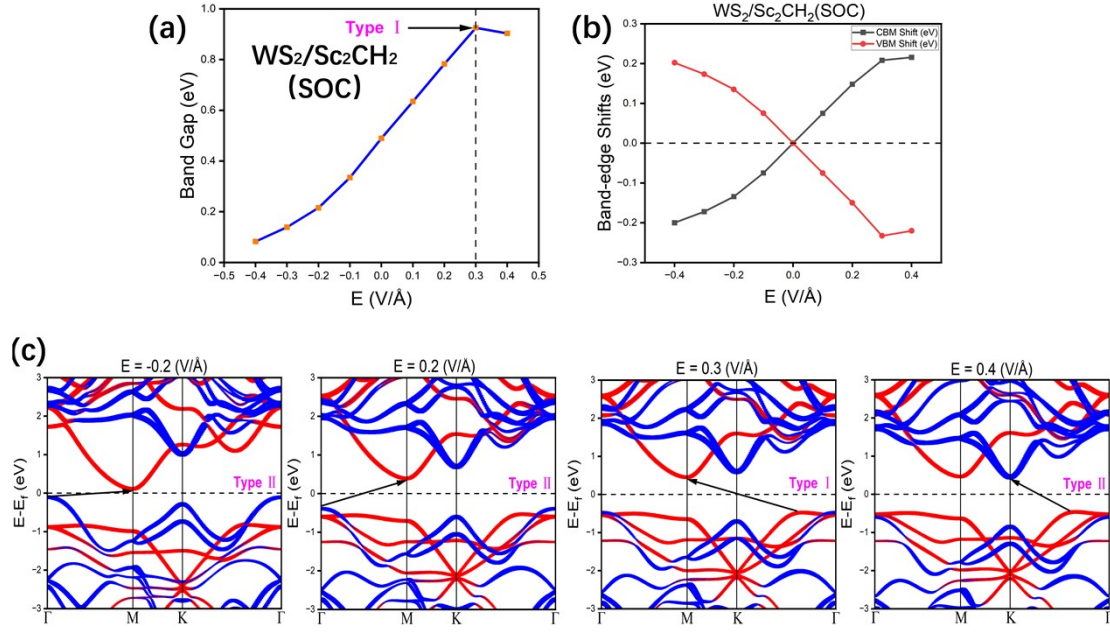

**Fig. S3.** (a) Variation of the band gap of the WS<sub>2</sub>/Sc<sub>2</sub>CH<sub>2</sub> heterostructure as a function of external electric field, with spin-orbit coupling (SOC) taken into account, the black arrow indicates that the heterojunction exhibits a Type I contact only at  $E = 0.3 \text{ V/Å}$ . (b) Evolution of band-edge positions of the WS<sub>2</sub>/Sc<sub>2</sub>CH<sub>2</sub> heterostructure under external electric fields, considering SOC effects. (c) Projected band structures of the WS<sub>2</sub>/Sc<sub>2</sub>CH<sub>2</sub> heterostructure under various external electric fields, with SOC effects included.

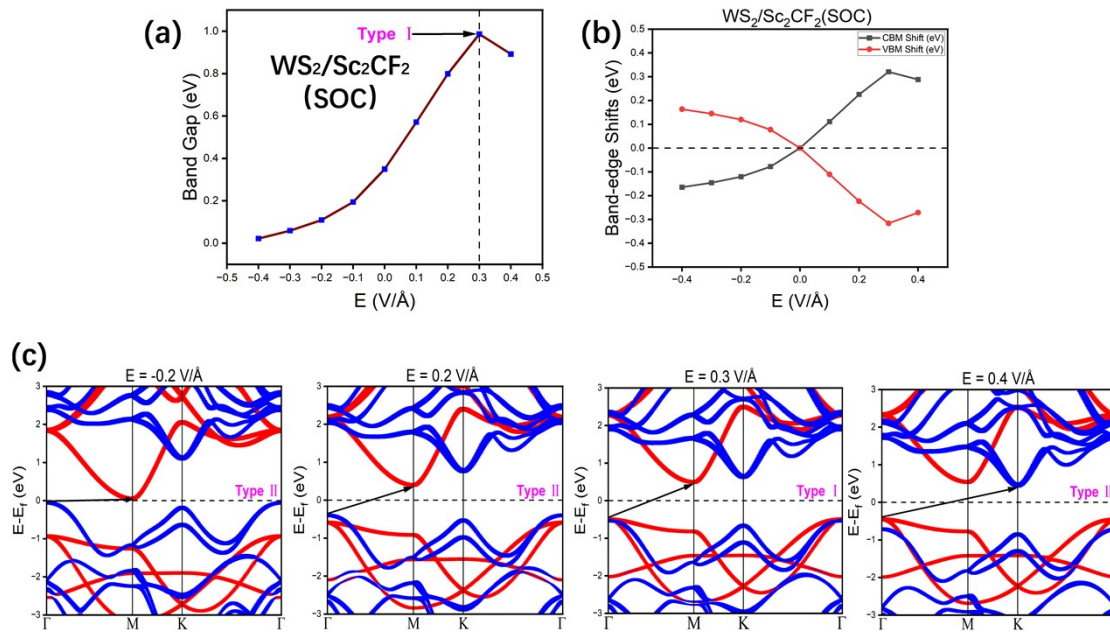

**Fig. S4.** (a) Variation of the band gap of the WS<sub>2</sub>/Sc<sub>2</sub>CF<sub>2</sub> heterostructure as a function of external electric field, with spin-orbit coupling (SOC) taken into account. (b) Evolution of band edge positions of the WS<sub>2</sub>/Sc<sub>2</sub>CF<sub>2</sub> heterostructure under external electric fields, considering SOC effects. (c) Projected band structures of the WS<sub>2</sub>/Sc<sub>2</sub>CF<sub>2</sub> heterostructure under various

external electric fields, with SOC effects included.

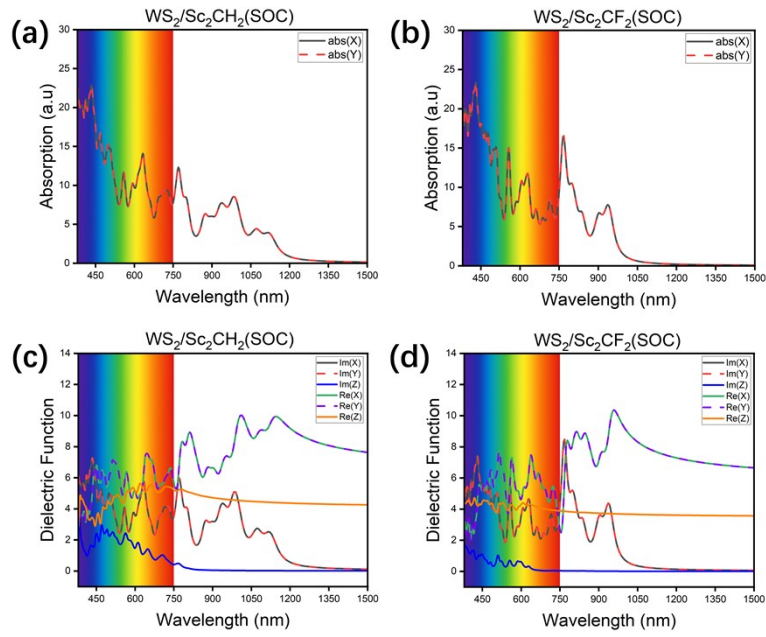

**Fig. S5.** Absorption spectra of (a) WS<sub>2</sub>/Sc<sub>2</sub>CH<sub>2</sub> and (b) WS<sub>2</sub>/Sc<sub>2</sub>CF<sub>2</sub> heterostructures with spin-orbit coupling (SOC) taken into account. Dielectric functions of (c) WS<sub>2</sub>/Sc<sub>2</sub>CH<sub>2</sub> and (d) WS<sub>2</sub>/Sc<sub>2</sub>CF<sub>2</sub> heterostructures with SOC effects considered.
